# Supplementary material for: The repetitive component of the sunflower genome as shown by different procedures for assembling next generation sequencing reads
Source: PubMed Central journal article supplement (PMC3852528; doi:10.1186/1471-2164-14-686), 2013-10-06
Supplement: 1471-2164-14-686-S2.pdf [file 1471-2164-14-686-S2.pdf]

Additional file 2. The 5 sets of CLC-BIO parameters used for mapping of the Illumina reads to 60 sunflower DNA sequences with known redundancy, and correlation between known copy number and average coverage

| Set | Parameters       |                  |                   |                    |            | Correlation<br>( $r^2$ ) | Significance<br>( $P$ ) |
|-----|------------------|------------------|-------------------|--------------------|------------|--------------------------|-------------------------|
|     | Mismatch<br>Cost | Deletion<br>Cost | Insertion<br>Cost | Length<br>fraction | Similarity |                          |                         |
| 1   | 1                | 1                | 1                 | 0.7                | 0.7        | 0.7803                   | <0.0001                 |
| 2   | 1                | 1                | 1                 | 0.8                | 0.8        | 0.7757                   | <0.0001                 |
| 3   | 1                | 1                | 1                 | 0.9                | 0.9        | 0.7872                   | <0.0001                 |
| 4   | 2                | 2                | 2                 | 0.9                | 0.9        | 0.7869                   | <0.0001                 |
| 5   | 3                | 3                | 3                 | 0.9                | 0.9        | 0.7852                   | <0.0001                 |
